# Supplementary material for: Nanocrystalline CoOxglass for highly-efficient alkaline hydrogen evolution reaction
Source: Royal Society of Chemistry journal article supplement (doi:10.1039/d2ta08073g), 2022-11-22
Supplement: d2ta08073g1.pdf [file d2ta08073g1.pdf]

## Nanocrystalline $\text{CoO}_x$ Glass for Highly-efficient Alkaline Hydrogen Evolution Reaction

Jinxian Feng <sup>a</sup>, Lulu Qiao <sup>a</sup>, Pengfei Zhou <sup>a</sup>, Haoyun Bai <sup>a</sup>, Chunfa Liu <sup>a</sup>, Chon Chio Leong <sup>b</sup>, Yu-Yun Chen <sup>a</sup>, Weng Fai Ip <sup>c</sup>, Jun Ni <sup>d</sup> and Hui Pan <sup>ac\*</sup>

<sup>a</sup> Institute of Applied Physics and Materials Engineering, University of Macau, Macao S. A. R., China

<sup>b</sup> Department of Electrical and Computer Engineering, Faculty of Science and Technology, University of Macau, Macao S. A. R., China

<sup>c</sup> Department of Physics and Chemistry, Faculty of Science and Technology, University of Macau, Macao S. A. R., China

<sup>d</sup> Institute of Industrial Catalysis, Zhejiang University of Technology, Hangzhou, 310014, China

Hui Pan: [huipan@um.edu.mo](mailto:huipan@um.edu.mo) (email), +853-88224427 (tel.), +853-88222454 (fax).

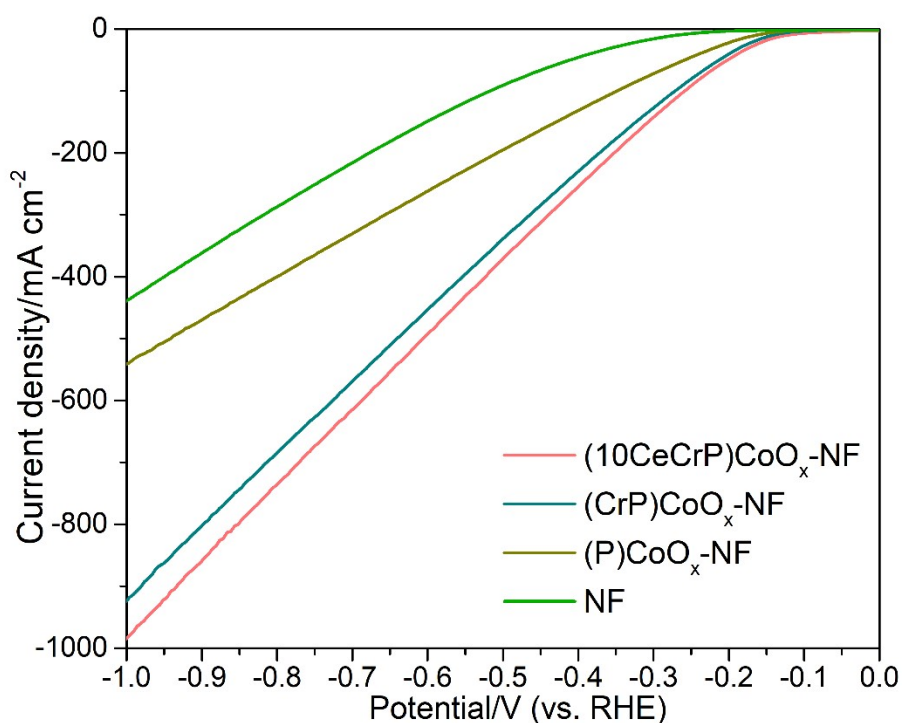

Figure S1. LSV curves of (10CeCrP)CoO<sub>x</sub>-NF, (CrP)CoO<sub>x</sub>-NF, (P)CoO<sub>x</sub>-NF and NF.

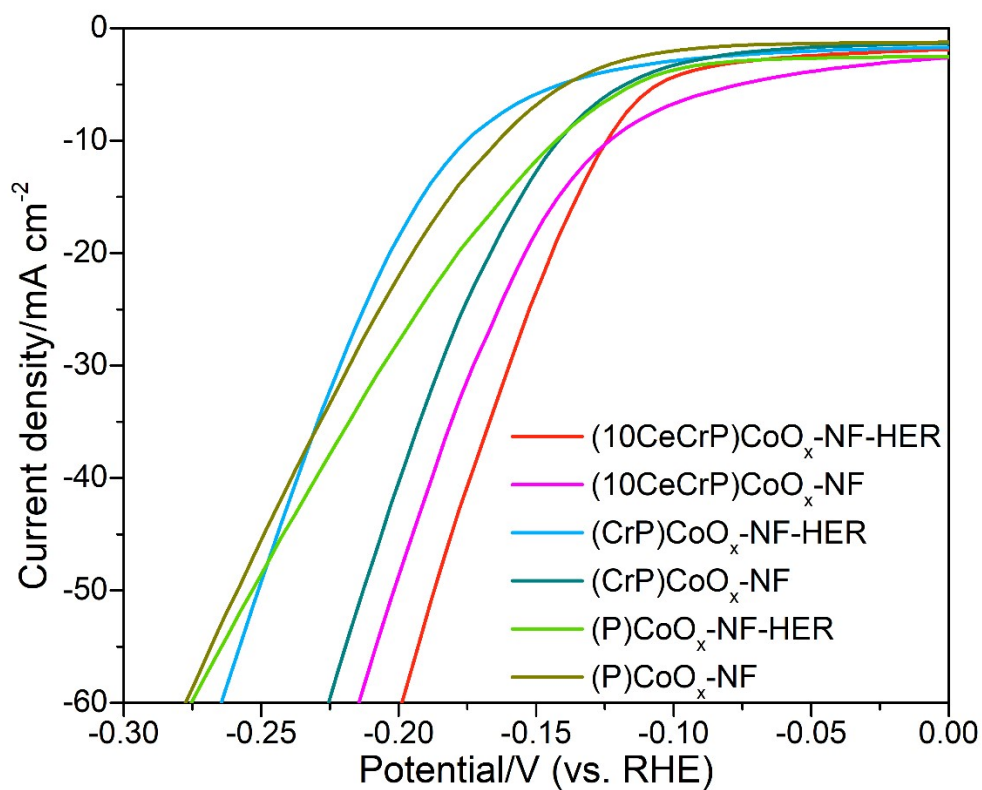

**Figure S2.** LSV curves of (10CeCrP)CoO<sub>x</sub>-NF, (10CeCrP)CoO<sub>x</sub>-NF-HER, (CrP)CoO<sub>x</sub>-NF, (CrP)CoO<sub>x</sub>-NF-HER, (P)CoO<sub>x</sub>-NF and (P)CoO<sub>x</sub>-NF-HER within 0 ~ -0.3 V.

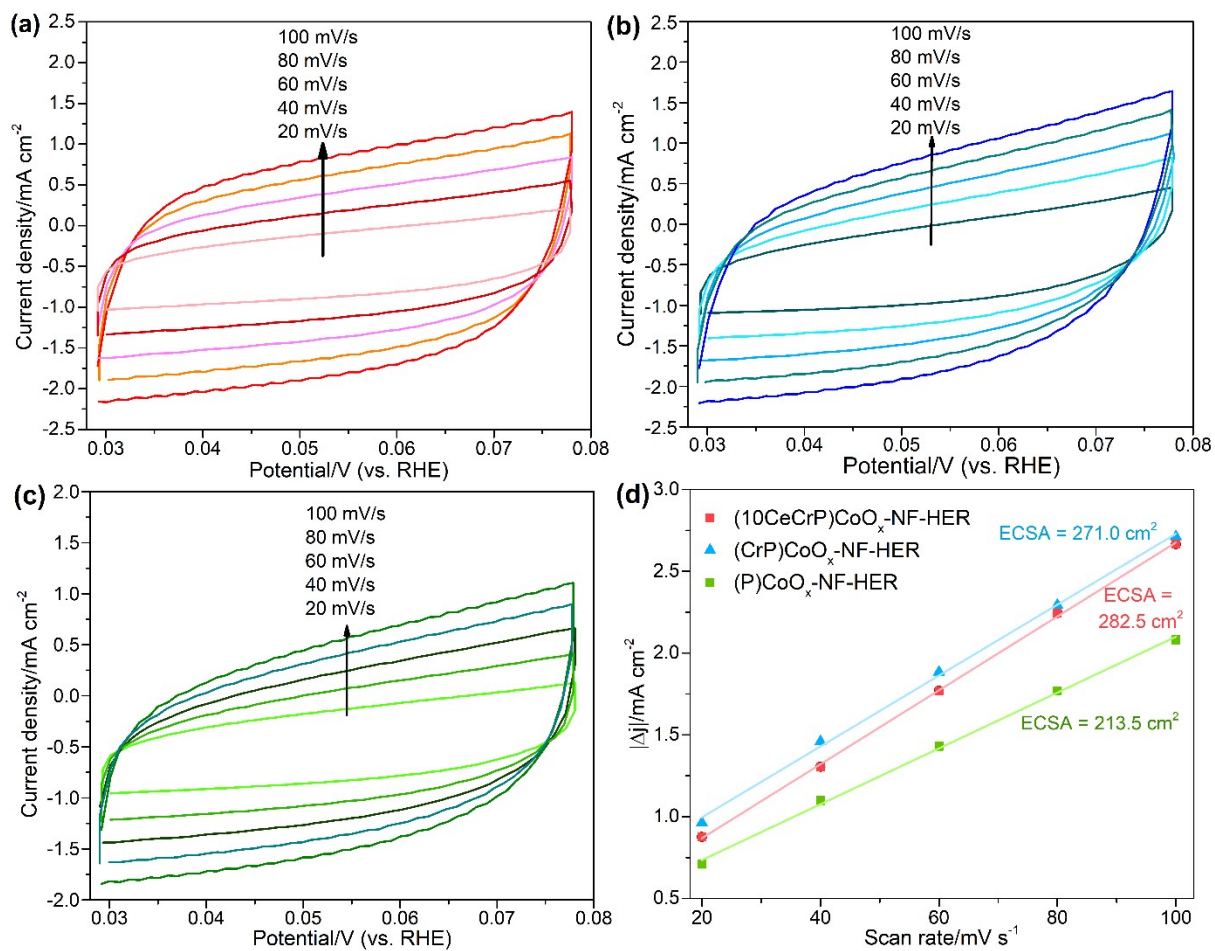

**Figure S3.** CV curves: (a) (10CeCrP)CoO<sub>x</sub>-NF-HER, (b) (CrP)CoO<sub>x</sub>-NF-HER and (c) (P)CoO<sub>x</sub>-NF-HER with different scan rates. (d) ECSAs of (10CeCrP)CoO<sub>x</sub>-NF-HER, (CrP)CoO<sub>x</sub>-NF-HER and (P)CoO<sub>x</sub>-NF-HER.

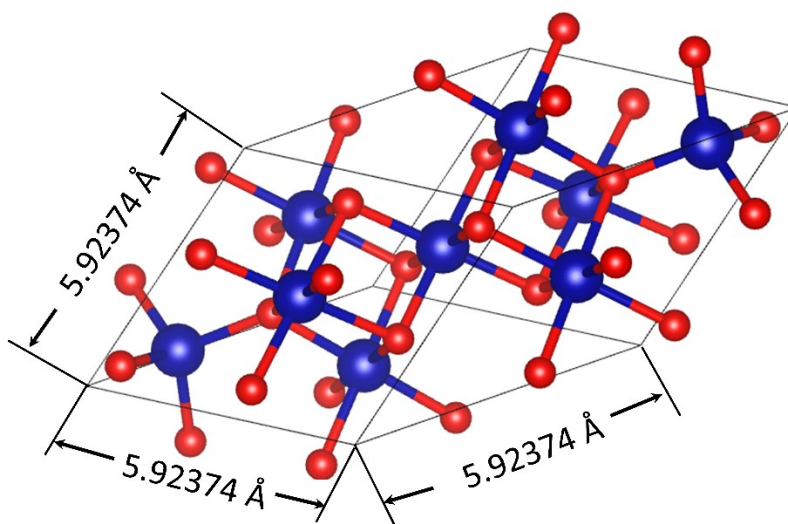

**Figure S4.** Co<sub>3</sub>O<sub>4</sub> unit cell. Cell volume: 144.3 Å<sup>3</sup>; total atoms: 14 (6Co + 8O) (Blue: Co, red: O).

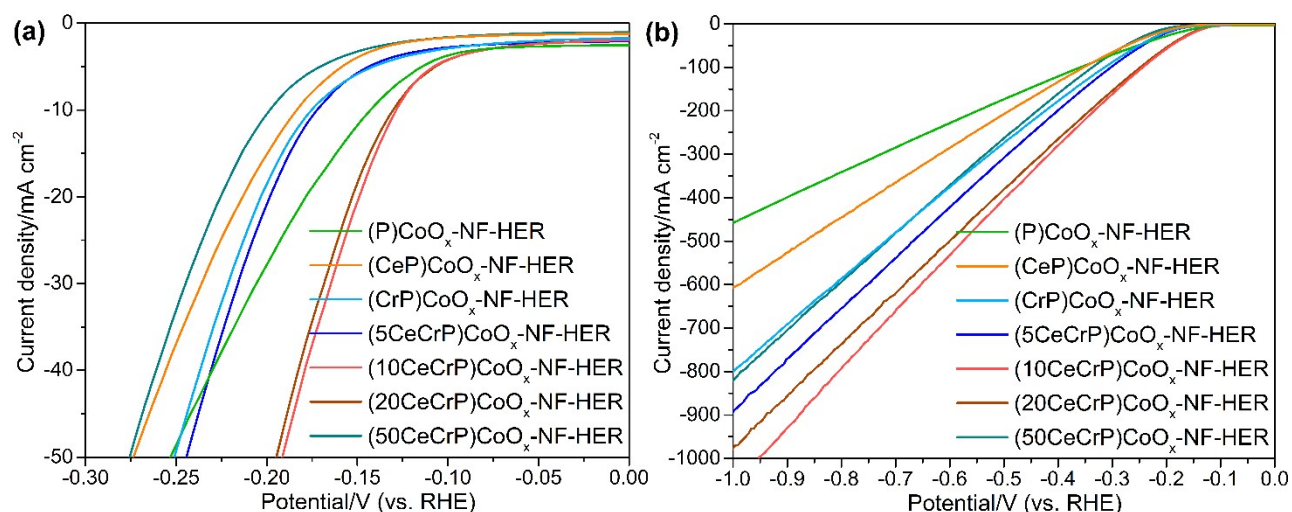

**Figure S5.** LSV curves of (P)CoO<sub>x</sub>-NF-HER, (CeP)CoO<sub>x</sub>-NF-HER, (CrP)CoO<sub>x</sub>-NF-HER and (xCeCrP)CoO<sub>x</sub>-NF-HER at different potential intervals: (a) 0 ~ -0.3 V and (b) 0 ~ -1.0 V.

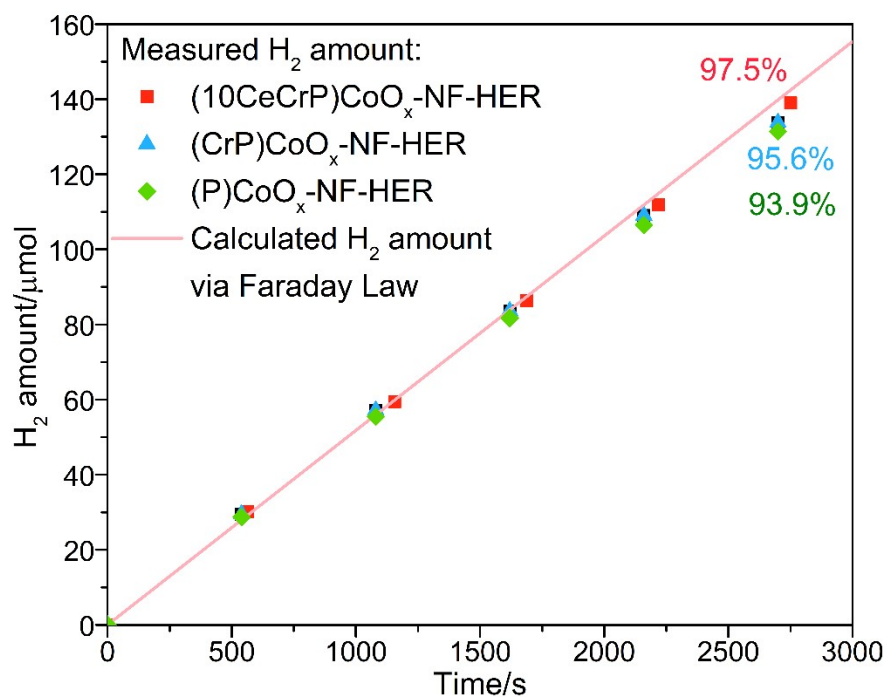

**Figure S6.** The theoretically calculated (red line) and experimentally measured (colored dots) hydrogen vs. time for (P)CoO<sub>x</sub>-NF-HER, (CrP)CoO<sub>x</sub>-NF-HER and (10CeCrP)CoO<sub>x</sub>-NF-HER at 20 mA cm<sup>-2</sup>.

**Table S1.** Comparison of (10CeCrP)CoO<sub>x</sub>-NF-HER and other reported electrocatalysts with similar composition in 1 M KOH.

| Electrocatalyst                                                          | Loading mass/mg per cm <sup>2</sup> | Current density/mA cm <sup>-2</sup> (Potential/V vs. RHE) | iR-correction       | Reference                                        |
|--------------------------------------------------------------------------|-------------------------------------|-----------------------------------------------------------|---------------------|--------------------------------------------------|
| (10CeCrP)CoO <sub>x</sub> -NF-HER                                        | 0.31                                | 10 (-0.128)                                               | No                  | This work                                        |
|                                                                          |                                     | 50 (-0.193)                                               |                     |                                                  |
|                                                                          |                                     | 100 (-0.245)                                              |                     |                                                  |
|                                                                          |                                     | 200 (-0.354)                                              |                     |                                                  |
|                                                                          |                                     | 500 (-0.580)                                              |                     |                                                  |
| CoFeO <sub>x</sub> (OH) <sub>y</sub> /CoO <sub>x</sub> (OH) <sub>y</sub> | 0.27                                | 10 (-0.26)                                                | Corrected           | Electrochimica Acta 391 (2020) 136038            |
|                                                                          |                                     | 50 (-0.32)                                                |                     |                                                  |
|                                                                          |                                     | 100 (-0.37)                                               |                     |                                                  |
| Co-WC@G/PCSs                                                             | 0.85                                | 30 (-0.17)                                                | Corrected           | ACS Appl. Nano Mater. 2021, 4, 11870–11880       |
|                                                                          |                                     | 100 (-0.2)                                                |                     |                                                  |
| CoP@BCN                                                                  | 0.4                                 | 10 (-0.210)                                               | No                  | Adv. Energy Mater. 2017, 1601671                 |
|                                                                          |                                     | 20 (-0.280)                                               |                     |                                                  |
| CoP@CoO <sub>x</sub>                                                     | 1.5                                 | 50 (-0.1)                                                 | Corrected           | ACS Appl. Energy Mater. 2020, 3, 309–318         |
|                                                                          |                                     | 100 (-0.109)                                              |                     |                                                  |
| Ru/Co <sub>4</sub> N-CoF <sub>2</sub>                                    | 3.5                                 | 10 (-0.053)                                               | 95% iR compensation | Chem. Eng. J. 414 (2021) 128865                  |
|                                                                          |                                     | 50 (-0.175)                                               |                     |                                                  |
|                                                                          |                                     | 100 (-0.220)                                              |                     |                                                  |
| CoP@a-CoO <sub>x</sub> plate                                             | 1.5                                 | 10 (-0.18)                                                | Corrected           | Adv. Sci. 2018, 5, 1800514                       |
|                                                                          |                                     | 100 (-0.25)                                               |                     |                                                  |
| Co-CoO/ZnFe <sub>2</sub> O <sub>4</sub> @CNWs                            | 0.5                                 | 10 (-0.226)                                               | --                  | J. Colloid and Interface Sci. 561 (2020) 620–628 |
|                                                                          |                                     | 20 (-0.30)                                                |                     |                                                  |
| N-C-Co20-100Pd                                                           | 3.5                                 | 10 (-0.140)                                               | 95% iR compensation | J. Mater. Chem. A, 2021, 9, 17724–17739          |
|                                                                          |                                     | 50 (-0.150)                                               |                     |                                                  |
| CoP/N-doped carbon                                                       | 0.42                                | 10 (-0.167)                                               | No                  | Electrochimica Acta 375 (2021) 137966            |
|                                                                          |                                     | 25 (-0.180)                                               |                     |                                                  |
| Co/CoO <sub>x</sub>                                                      | --                                  | 10 (-0.220)                                               | No                  | Nano Energy 32                                   |

|                                            |       |              |              |                                                       |
|--------------------------------------------|-------|--------------|--------------|-------------------------------------------------------|
| nanoshoots/perovskite                      |       | 50 (-0.270)  |              | (2017) 247–254                                        |
|                                            |       | 100 (-0.30)  |              |                                                       |
| NiCo-N                                     |       | 50 (-0.150)  | 90% iR       | Mater. Today                                          |
| -O nanosheet hybrids                       | --    | 100 (-0.190) | compensation | Energy 21 (2021)<br>100784                            |
| CoO <sub>x</sub> -N-C/TiO <sub>2</sub> C   | 0.283 | 10 (-0.38)   | No           | Journal of Power<br>Sources 414<br>(2019) 333–344     |
| V <sub>Zn</sub> -ZnCoPi-OH                 | 12    | 50 (-0.160)  | 95% iR       | Mater. Today                                          |
|                                            |       | 100 (-0.180) | compensation | Phys. 20 (2021)<br>100448                             |
| CoO <sub>x</sub> catalyst in-situ grown on |       | 20 (-0.112)  |              |                                                       |
| Co foam                                    | ---   | 50 (-0.150)  | iR           | Front. Chem.,                                         |
|                                            |       | 100 (-0.190) | compensation | 2020, 8, 386                                          |
|                                            |       | 50 (-0.20)   |              |                                                       |
| CoP/o-CC                                   | 0.32  | 100 (-0.23)  | Corrected    | Inter. J. Hydrogen<br>Energy. 2022 47<br>9209         |
|                                            |       | 200 (-0.260) |              |                                                       |
|                                            |       | 10 (-0.28)   |              |                                                       |
| CoFe/N <sub>H</sub> -C NS                  | 1.8   | 50 (-0.350)  | Corrected    | ACS Sustainable<br>Chem. Eng. 2019,<br>7, 15278–15288 |
|                                            |       | 10 (-0.175)  |              |                                                       |
| Co@C/NC                                    | 0.4   | 50 (-0.280)  | 80% iR       | Energy Fuels                                          |
|                                            |       | 100 (-0.370) | compensation | 2022, 36,<br>1688–1696                                |
|                                            |       | 50 (-0.180)  |              |                                                       |
| Ni, S-Codoped CoO                          | 0.87  | 100 (-0.225) | Corrected    | ACS Sustainable<br>Chem. Eng. 2019,<br>7, 12501–12509 |
|                                            |       | 200 (-0.250) |              |                                                       |
|                                            |       | 10 (-0.108)  | 90% iR       | Chem.                                                 |
| CFC-CNT-CoO <sub>x</sub> /CoP              | 0.41  | 50 (-0.152)  | compensation | Engineering J.<br>416 (2021)<br>128943                |
|                                            |       | 10 (-0.320)  |              |                                                       |
| CoO <sub>x</sub> /CoN <sub>y</sub> @CN     | 0.283 | 50 (-0.380)  | Corrected    | Appl. Cat. B:<br>Environ. (2020)<br>279 119407        |
|                                            |       | 80 (-0.410)  |              |                                                       |
|                                            |       | 10 (-0.08)   |              |                                                       |
| Co-NiS <sub>2</sub> NSs                    | 0.84  | 50 (-0.160)  | Corrected    | Angew. Chem.<br>Int. Ed. 2019, 58,<br>18676 – 18682   |
|                                            |       | 100 (-0.20)  |              |                                                       |
|                                            |       | 10 (-0.123)  |              |                                                       |
| N-doped CoO nanowire arrays                | --    | 50 (-0.220)  | --           | Catalysts 2021,<br>11, 1237                           |

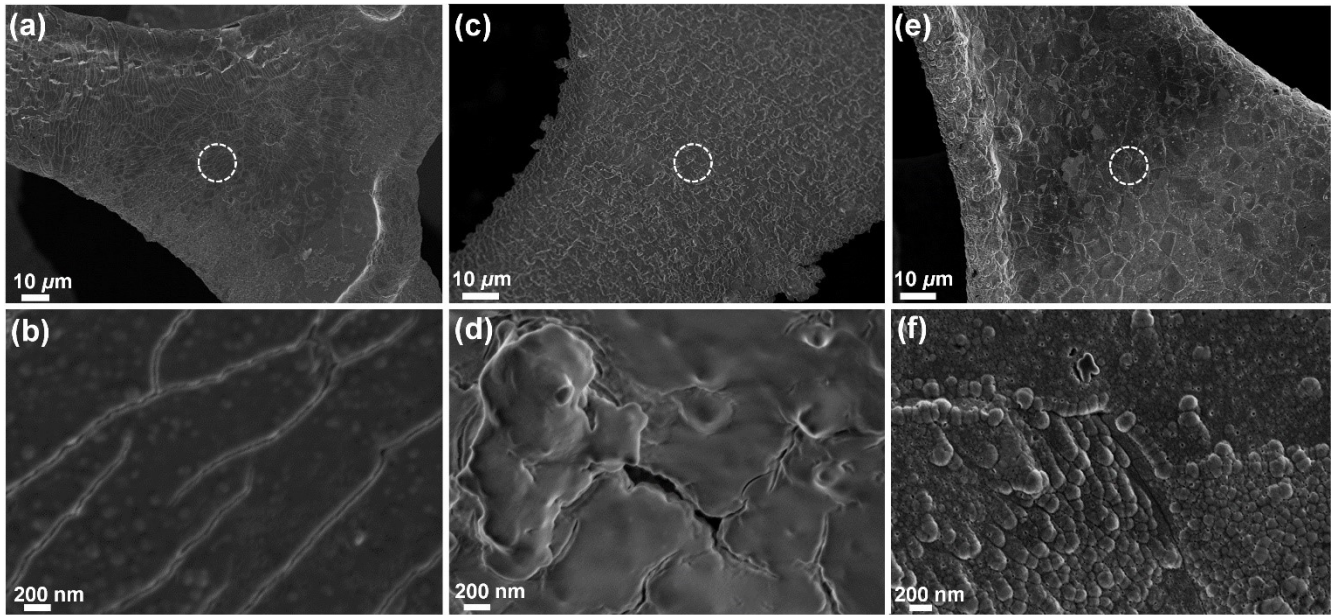

**Figure S7.** SEM images: (a-b) (10CeCrP)CoO<sub>x</sub>-NF, (c-d) (CrP)CoO<sub>x</sub>-NF, and (e-f) (P)CoO<sub>x</sub>-NF.

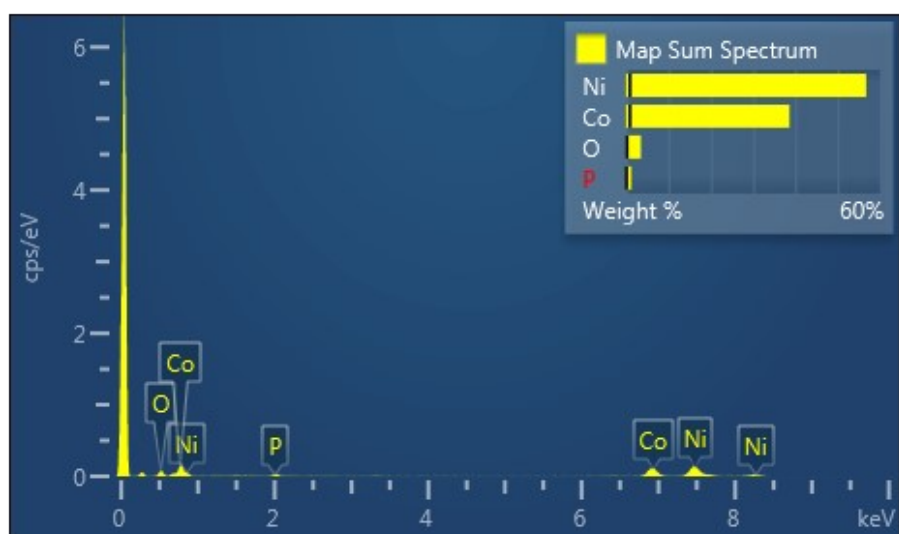

**Figure S8.** EDS spectrum of (P)CoO<sub>x</sub>-NF-HER.

**Table S2.** Elemental composition of (P)CoO<sub>x</sub>-NF-HER

| Element | Atomic % |
|---------|----------|
| O       | 11.56    |
| P       | 2.11     |
| Co      | 34.89    |
| Ni      | 51.45    |
| Total:  | 100.00   |



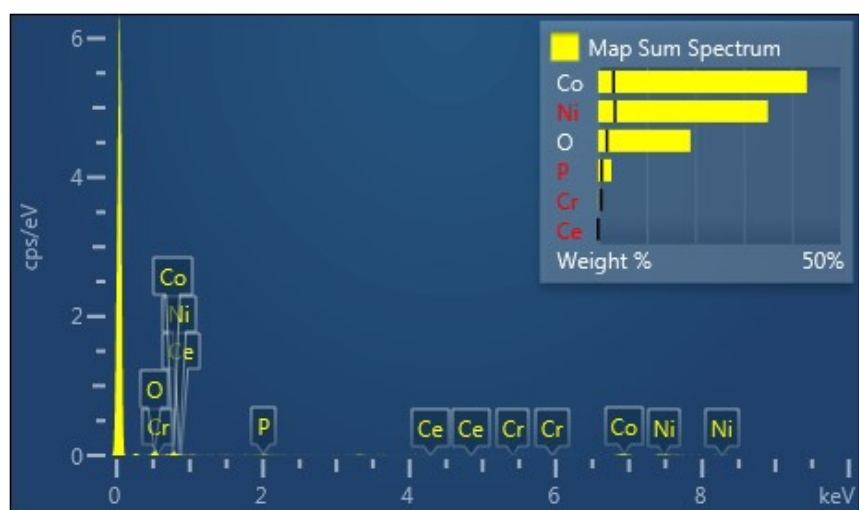

**Figure S9.** EDS spectrum of (CrP)CoO<sub>x</sub>-NF-HER.

**Table S3.** Elemental composition of (CrP)CoO<sub>x</sub>-NF-HER

| Element | Atomic % |
|---------|----------|
| O       | 45.68    |
| P       | 3.39     |
| Cr      | 0.08     |
| Co      | 28.00    |
| Ni      | 22.84    |
| Ce      | 0.00     |
| Total:  | 100.00   |

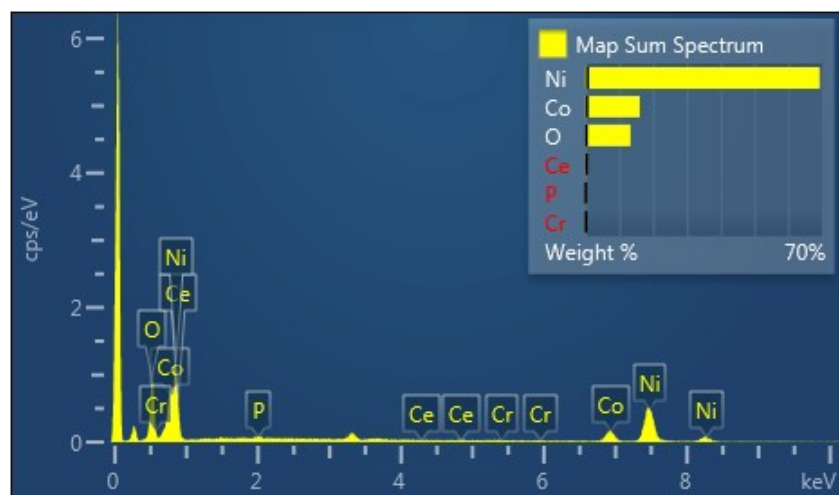

**Figure S10.** EDS spectrum of (10CeCrP)CoO<sub>x</sub>-NF-HER.

**Table S4.** Elemental composition of (10CeCrP)CoO<sub>x</sub>-NF-HER

| Element | Atomic/% |
|---------|----------|
| O       | 36.15    |
| P       | 0.59     |
| Cr      | 0.12     |
| Co      | 11.81    |
| Ni      | 51.11    |
| Ce      | 0.21     |
| Total:  | 100.00   |

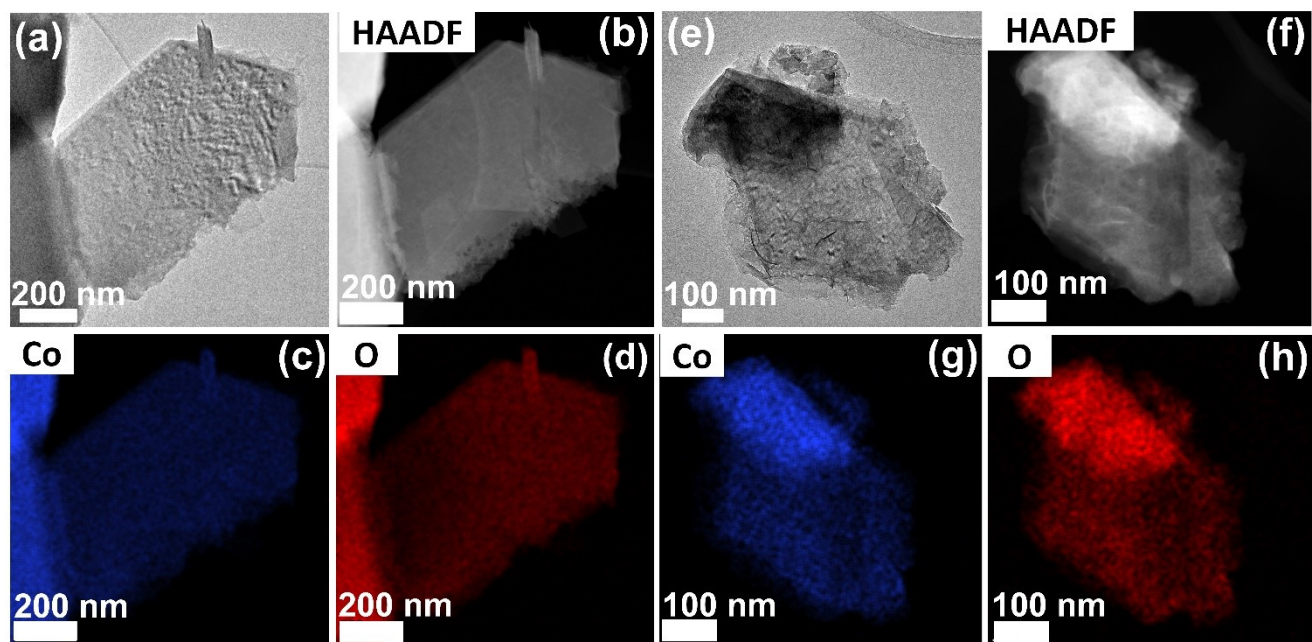

**Figure S11.** (CrP)CoO<sub>x</sub>-NF-HER: (a) TEM image, (b) STEM-HAADF, and (c-d) EDS elemental mappings of Co and O. (P)CoO<sub>x</sub>-NF-HER: (e) TEM image, (f) STEM-HAADF, and (g-h) EDS elemental mappings of Co and O.

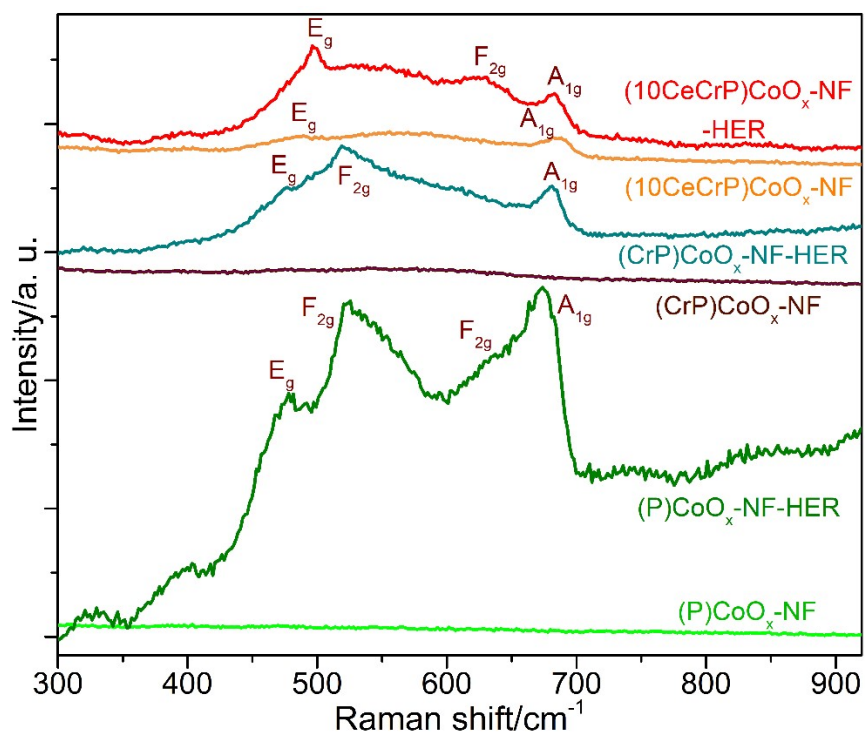

**Figure S12.** Raman spectra of (P)CoO<sub>x</sub>-NF, (CrP)CoO<sub>x</sub>-NF and (10CeCrP)CoO<sub>x</sub>-NF before and after HER.

The Raman spectra (Figure S12) show that (CrP)CoO<sub>x</sub>-NF and (P)CoO<sub>x</sub>-NF-HER show negligible characteristic peak of CoO<sub>x</sub>. However, the peaks are obvious after the HER test.<sup>1, 2</sup> Meanwhile, we can also see that the intensities of CoO<sub>x</sub> characteristic peaks of (10CeCrP)CoO<sub>x</sub>-NF-HER are stronger than those of (10CeCrP)CoO<sub>x</sub>-NF. Therefore, the crystallinity of CoO<sub>x</sub> was enhanced during HER.

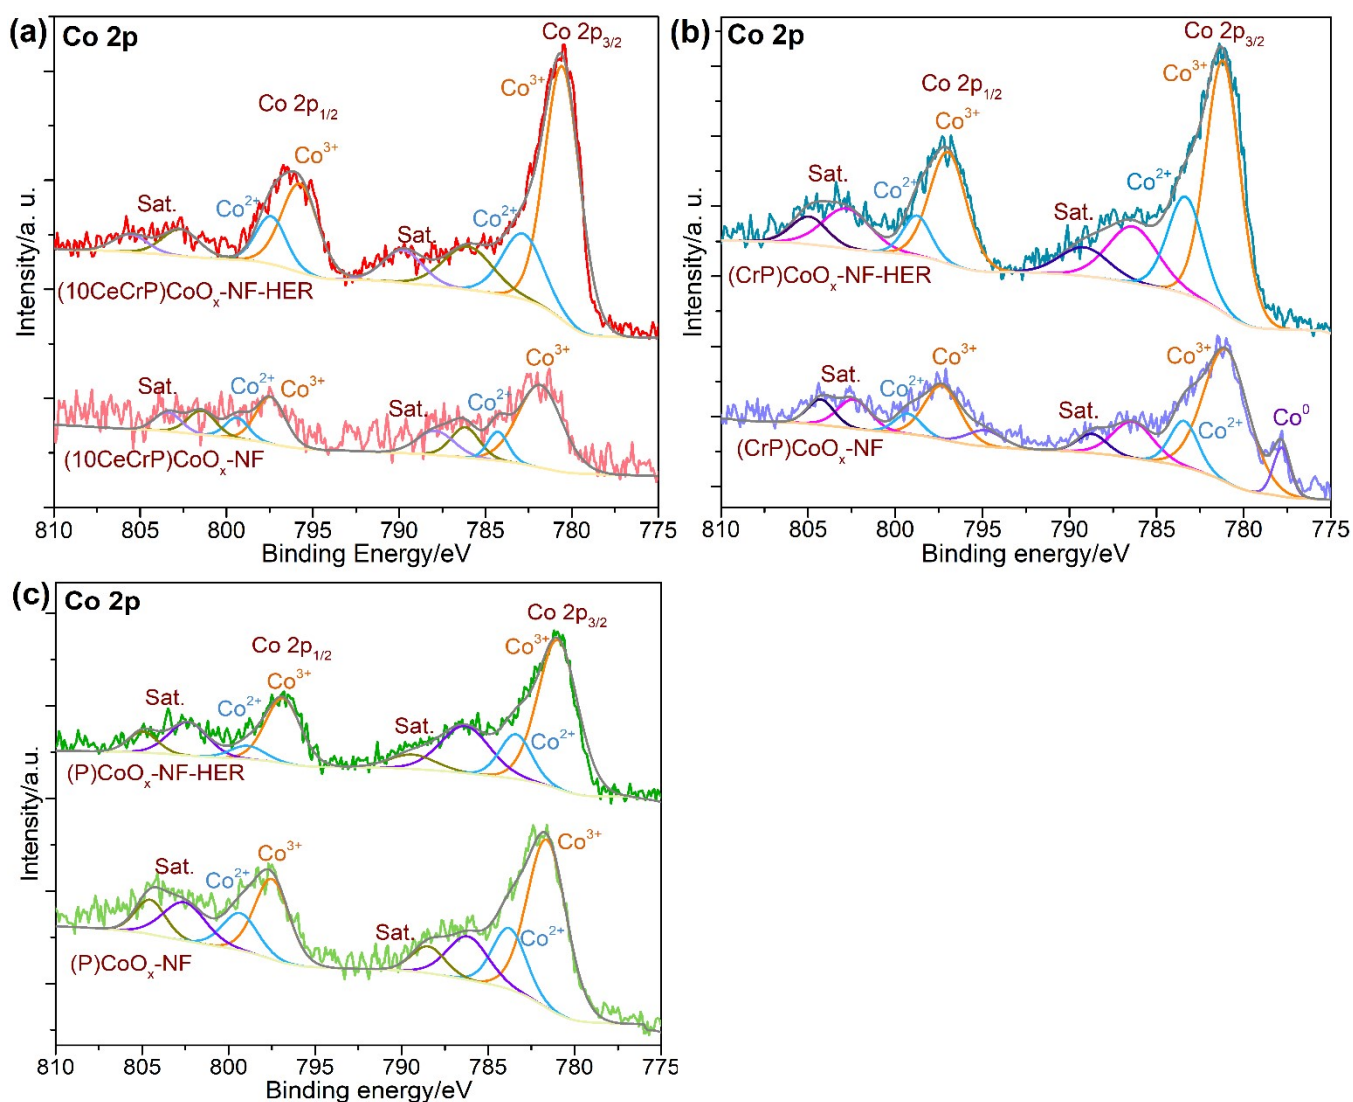

**Figure S13.** XPS spectra of (a) (10CeCrP)CoO<sub>x</sub>-NF, (b) (CrP)CoO<sub>x</sub>-NF and (c) (P)CoO<sub>x</sub>-NF before and after HER.

The chemical states of Co in (P)CoO<sub>x</sub>-NF, (CrP)CoO<sub>x</sub>-NF and (10CeCrP)CoO<sub>x</sub>-NF before and after HER were studied by XPS. The Co 2p XPS spectra of (10CeCrP)CoO<sub>x</sub>-NF and (10CeCrP)CoO<sub>x</sub>-NF-HER have eight main peaks, including Co 2p<sub>3/2</sub> and 2p<sub>1/2</sub> peaks for both Co<sup>3+</sup> and Co<sup>2+</sup> in Co<sub>3</sub>O<sub>4</sub>, as well as their satellite peaks (Figure S13a). The Co 2p spectrum of (CrP)CoO<sub>x</sub>-NF-HER shows eight main peaks too. But the Co 2p spectrum of (CrP)CoO<sub>x</sub>-NF shows ten main peaks, including Co 2p<sub>3/2</sub> and 2p<sub>1/2</sub> peaks for metallic Co (Co<sup>0</sup>), and their satellite peaks (Figure S13b). For the Co 2p spectra of (P)CoO<sub>x</sub>-NF and (P)CoO<sub>x</sub>-NF-HER, eight main peaks for both Co<sup>3+</sup> and Co<sup>2+</sup> in Co<sub>3</sub>O<sub>4</sub>, as well as their satellite peaks can be seen (Figure S13c).<sup>3-5</sup> Comparing the Co 2p spectra of (P)CoO<sub>x</sub>-NF, (CrP)CoO<sub>x</sub>-NF and (10CeCrP)CoO<sub>x</sub>-NF before and after HER, the peak intensities and areas of different Co characteristic signals change, suggesting the chemical states of Co change during the HER process.

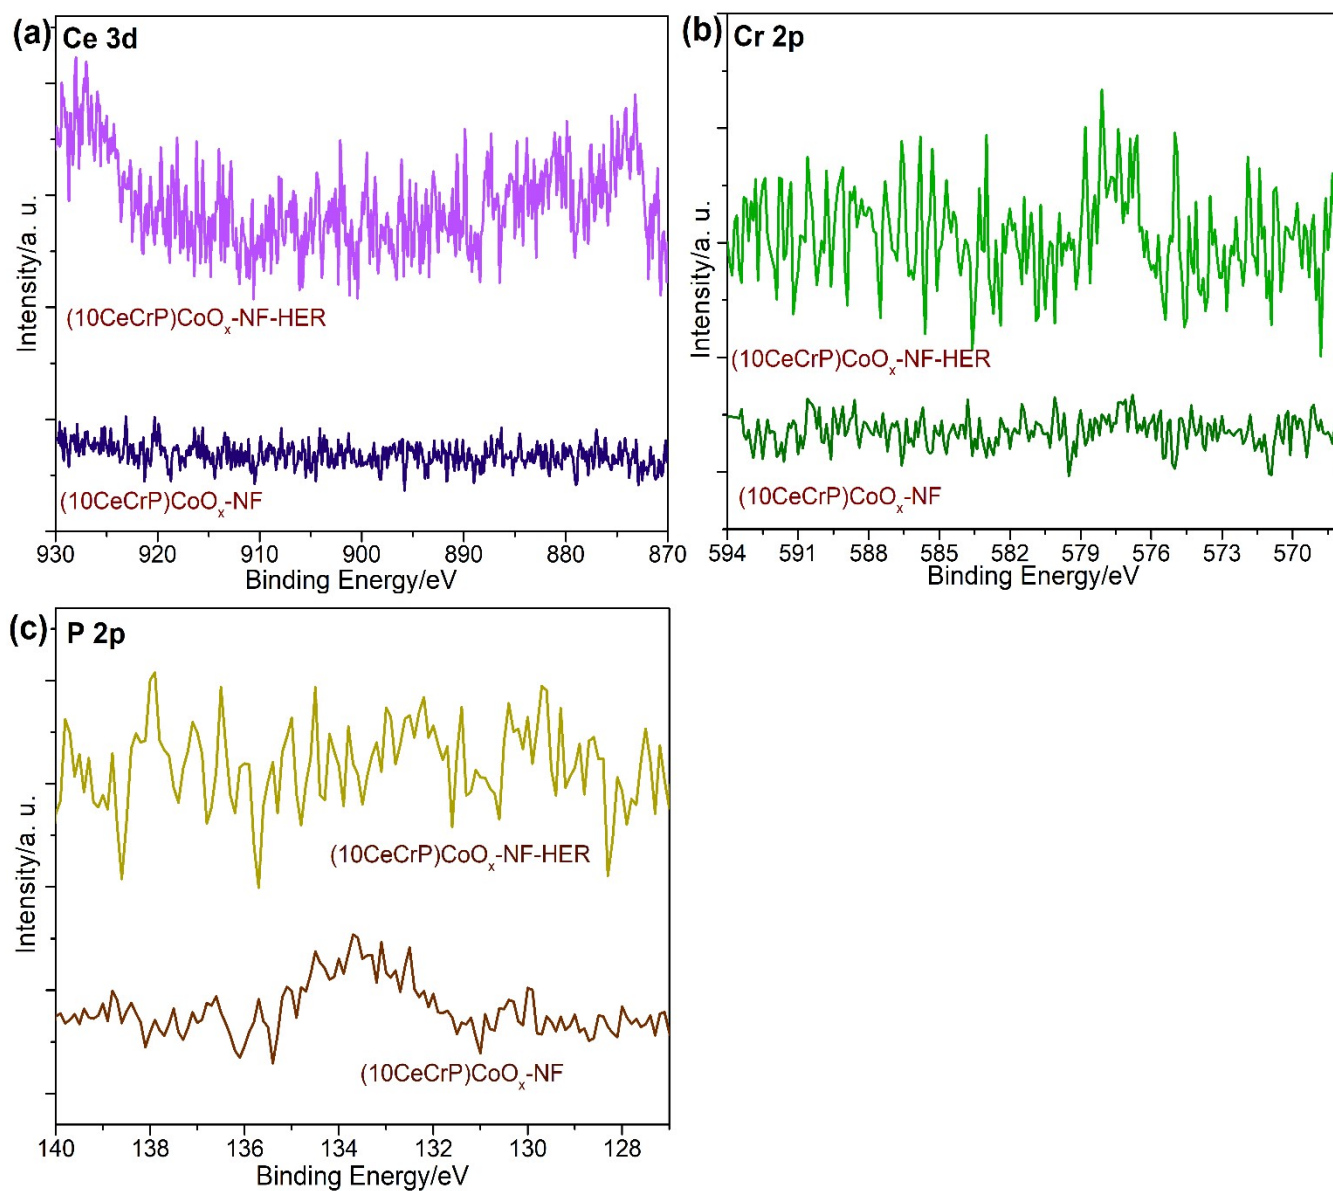

**Figure S14.** XPS spectra of (10CeCrP)CoO<sub>x</sub>-NF and (10CeCrP)CoO<sub>x</sub>-NF-HER. (a) Ce 3d; (b) Cr 2p and (c) P 2p.

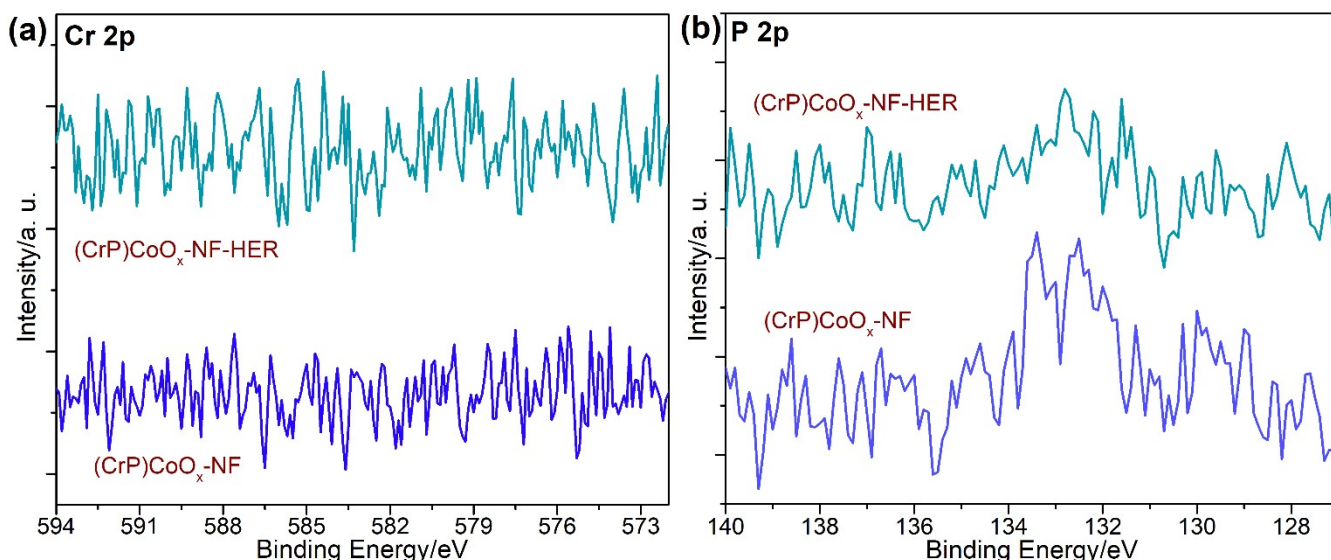

**Figure S15.** (a) Cr 2p and (b) P 2p XPS spectra of (CrP)CoO<sub>x</sub>-NF and (CrP)CoO<sub>x</sub>-NF-HER.

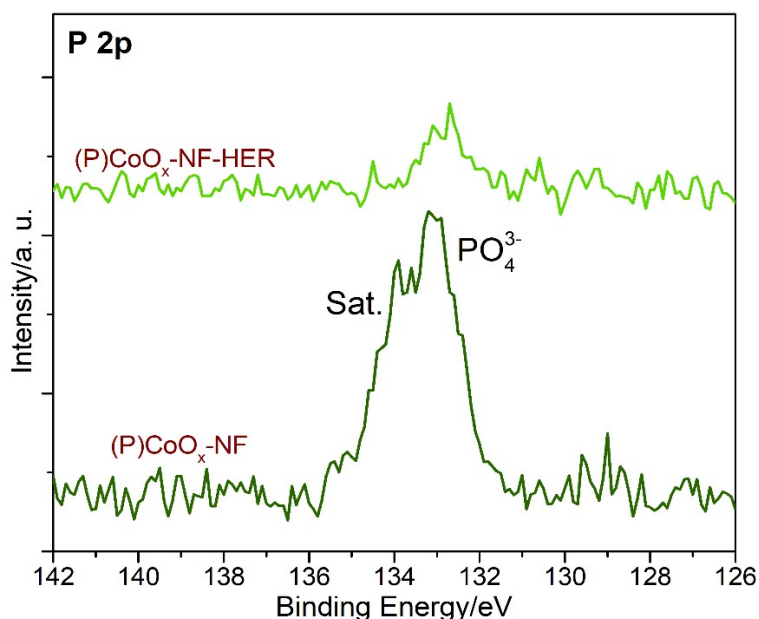

**Figure S16.** P 2p XPS spectra of (P)CoO<sub>x</sub>-NF and (P)CoO<sub>x</sub>-NF-HER.

The chemical states of Cr, Ce and P in the electrocatalysts were studied by XPS. We can see that for the XPS spectra of (10CeCrP)CoO<sub>x</sub>-NF and (10CeCrP)CoO<sub>x</sub>-NF-HER, no obvious Ce 3d, Cr 2p and P 2p characteristic peaks can be observed (Figure S14). Meanwhile, the XPS spectra of (CrP)CoO<sub>x</sub>-NF and (CrP)CoO<sub>x</sub>-NF-HER show no obvious characteristic peaks of Cr 2p and P 2p too (Figure S15). For the XPS spectrum of (P)CoO<sub>x</sub>-NF, two characteristic peaks can be observed, represent PO<sub>4</sub><sup>3-</sup> and its satellite peak.<sup>6, 7</sup> Compared with (P)CoO<sub>x</sub>-NF, those characteristic peaks of (P)CoO<sub>x</sub>-NF-HER become weaker, suggesting the P element leaches out during HER (Figure S16). Those results suggest that the Ce, Cr and P plays negligible role in HER.

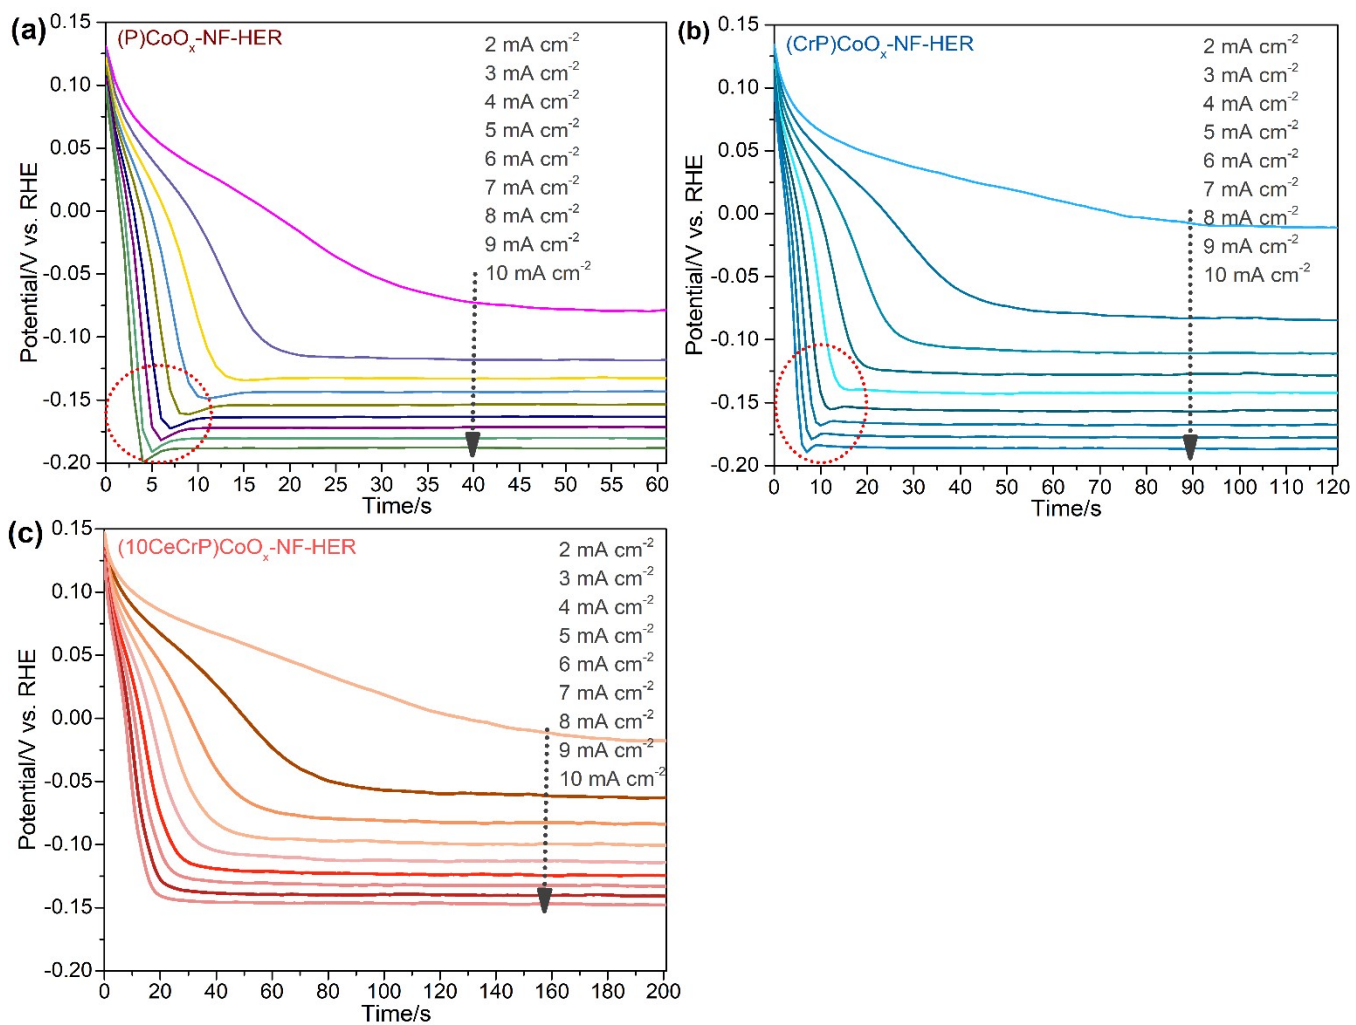

**Figure S17.** Potential-time dependent curves of (a) (P)CoO<sub>x</sub>-NF-HER, (b) (CrP)CoO<sub>x</sub>-NF-HER and (c) (10CeCrP)CoO<sub>x</sub>-NF-HER measured at 2~10 mA cm<sup>-2</sup>.



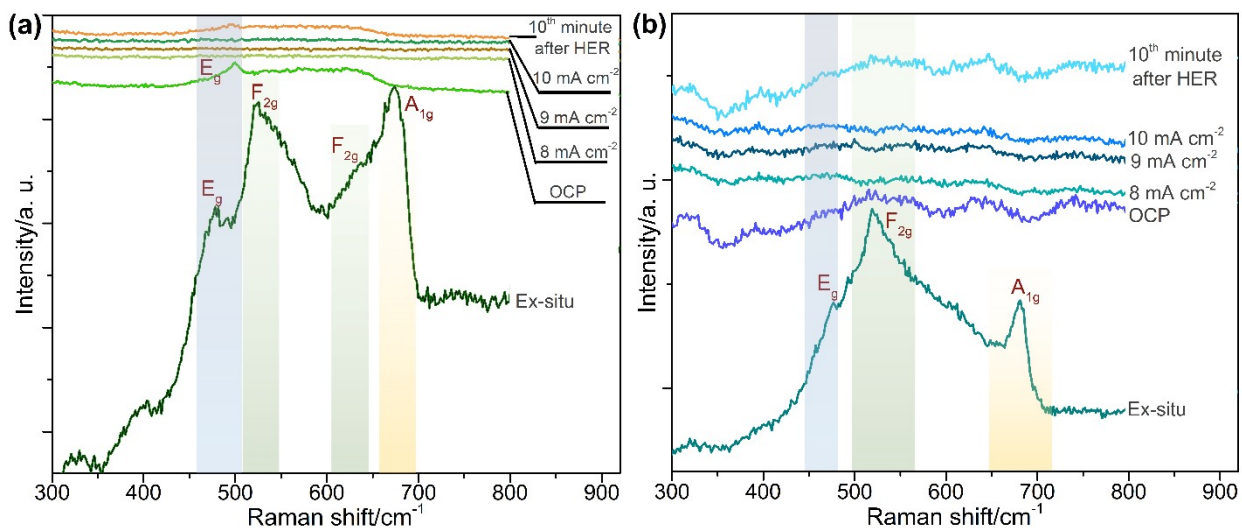

**Figure S18.** Raman spectra: (a) (P)CoO<sub>x</sub>-NF-HER and (b) (CrP)CoO<sub>x</sub>-NF-HER.

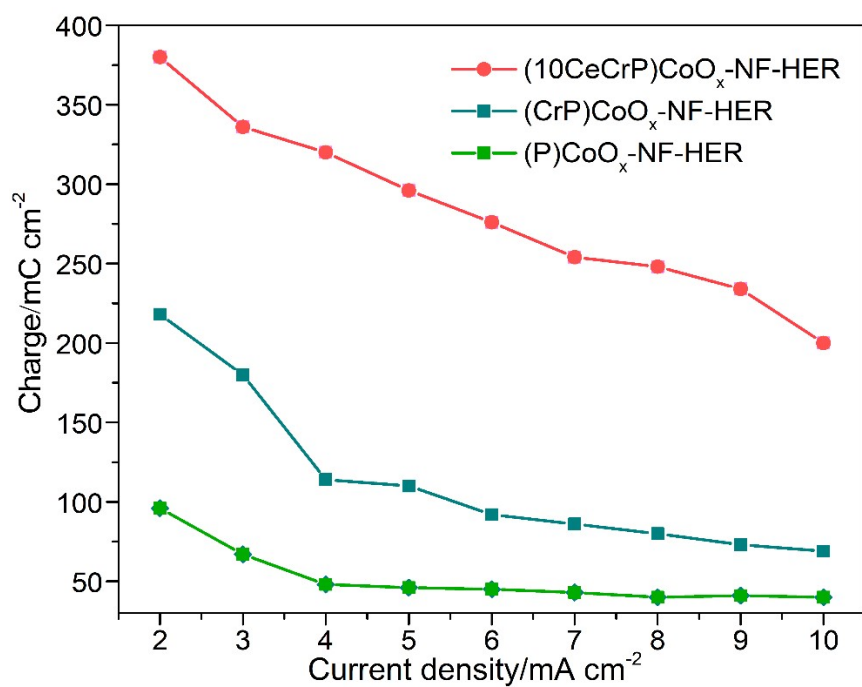

**Figure S19.** Plots of charge-current density for (10CeCrP)CoO<sub>x</sub>-NF-HER, (CrP)CoO<sub>x</sub>-NF-HER and (P)CoO<sub>x</sub>-NF-HER.

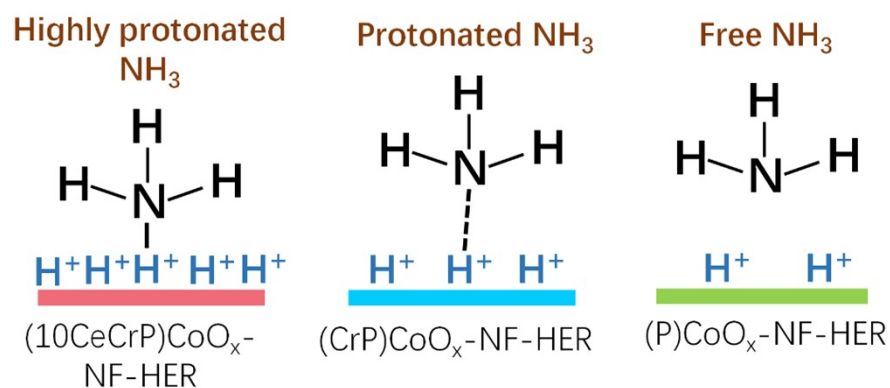

**Figure S20.** Scheme of different interactions between protons and probe molecule (NH<sub>3</sub>) on (10CeCrP)CoO<sub>x</sub>-NF-HER, (CrP)CoO<sub>x</sub>-NF-HER and (P)CoO<sub>x</sub>-NF-HER.

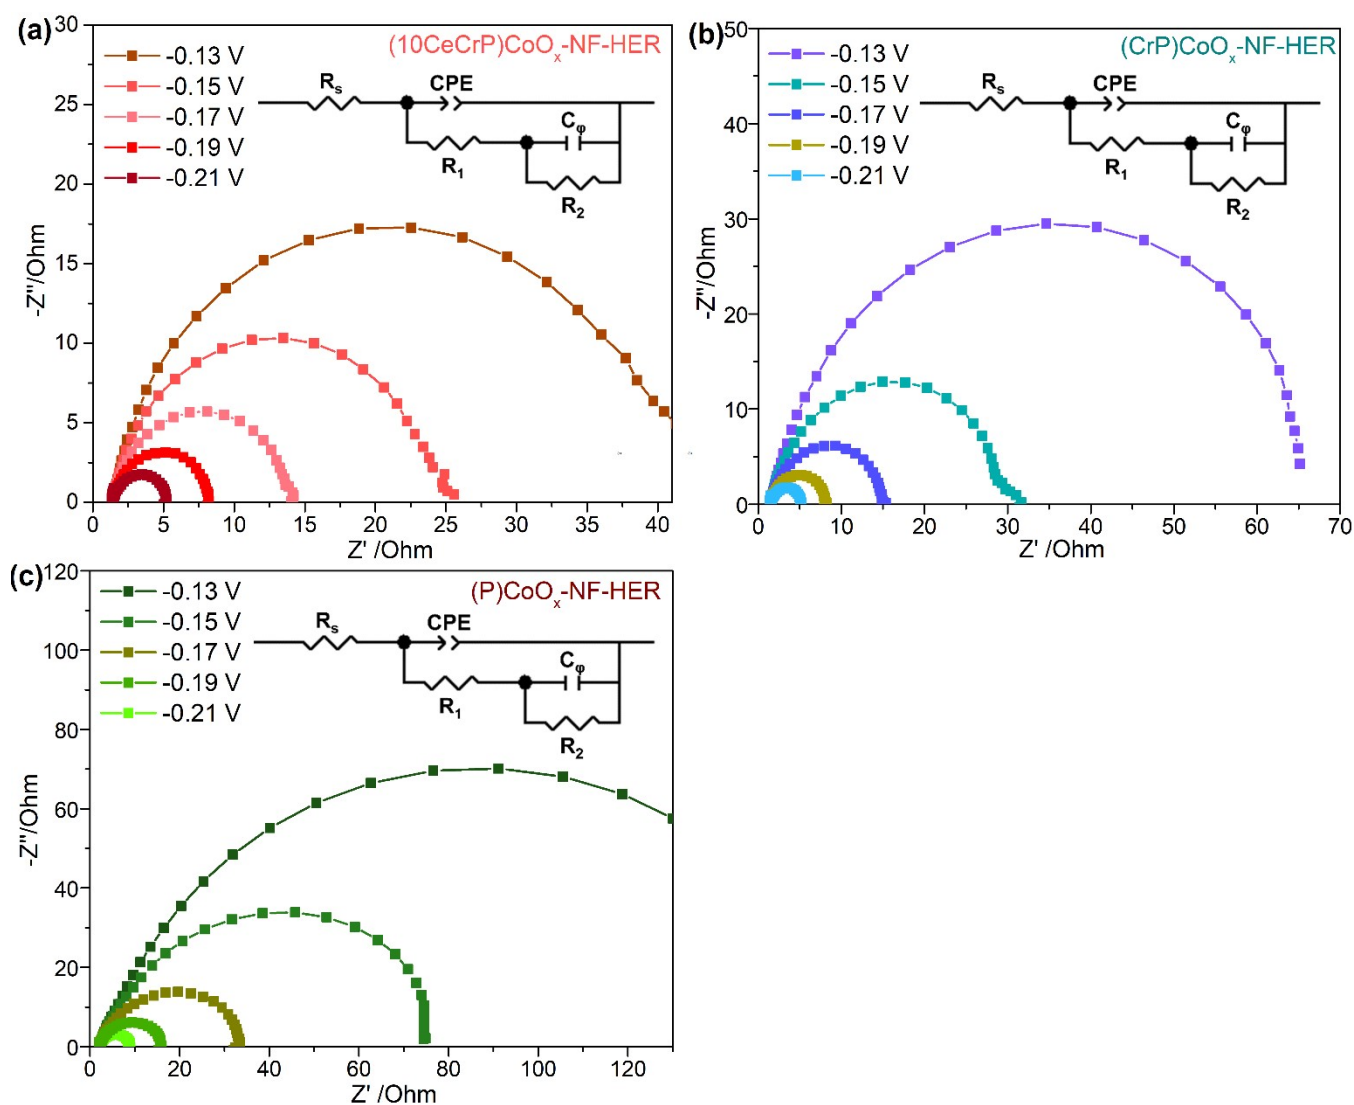

**Figure S21.** Nyquist plots of (a) (10CeCrP)CoO<sub>x</sub>-NF-HER, (b) (CrP)CoO<sub>x</sub>-NF-HER and (c) (P)CoO<sub>x</sub>-NF-HER. Inset: the electronic circuit utilized to fit the curve.

**Table S5.** The fitted parameters of the EIS data of the (10CeCrP)CoO<sub>x</sub>-NF-HER, (CrP)CoO<sub>x</sub>-NF-HER and (P)CoO<sub>x</sub>-NF-HER.

| Catalyst                              | Potential/V<br>vs. RHE | R <sub>s</sub> /Ω | C <sub>T</sub> /(F S <sup>n</sup> ) <sup>-1</sup> | C <sub>p</sub> | R <sub>1</sub> /Ω | R <sub>2</sub> /Ω | C <sub>φ</sub> /F |
|---------------------------------------|------------------------|-------------------|---------------------------------------------------|----------------|-------------------|-------------------|-------------------|
| (10CeCrP)CoO <sub>x</sub> -<br>NF-HER | -0.13                  | 1.342             | 0.0189                                            | 0.8874         | 1.683             | 38.07             | 0.00532           |
|                                       | -0.15                  | 1.341             | 0.0172                                            | 0.8847         | 1.158             | 22.15             | 0.00552           |
|                                       | -0.17                  | 1.343             | 0.0150                                            | 0.9015         | 1.08              | 11.55             | 0.00640           |
|                                       | -0.19                  | 1.341             | 0.0134                                            | 0.8971         | 0.6728            | 6.299             | 0.00678           |
|                                       | -0.21                  | 1.353             | 0.0108                                            | 0.9308         | 0.6298            | 3.223             | 0.00811           |
| (CrP)CoO <sub>x</sub> -NF-<br>HER     | -0.13                  | 1.409             | 0.0131                                            | 0.8440         | 2.028             | 69.92             | 0.00267           |
|                                       | -0.15                  | 1.409             | 0.0107                                            | 0.8582         | 1.345             | 27.91             | 0.00306           |
|                                       | -0.17                  | 1.404             | 0.0088                                            | 0.8659         | 0.9108            | 12.95             | 0.00339           |
|                                       | -0.19                  | 1.409             | 0.00680                                           | 0.8825         | 0.5765            | 6.22              | 0.00377           |
|                                       | -0.21                  | 1.404             | 0.00448                                           | 0.9096         | 0.4051            | 3.379             | 0.00442           |
| (P)CoO <sub>x</sub> -NF-HER           | -0.13                  | 2.032             | 0.00770                                           | 0.8368         | 54.68             | 122.6             | 0.000428          |
|                                       | -0.15                  | 2.038             | 0.00687                                           | 0.8542         | 36.39             | 44.69             | 0.00254           |
|                                       | -0.17                  | 2.035             | 0.00619                                           | 0.8663         | 16.26             | 16.38             | 0.00193           |
|                                       | -0.19                  | 2.003             | 0.00450                                           | 0.8513         | 1.009             | 13.2              | 0.00137           |
|                                       | -0.21                  | 1.991             | 0.00279                                           | 0.8754         | 0.5391            | 6.508             | 0.00189           |

Nyquist plots were simulated by a double-parallel equivalent circuit model. The first parallel components (C<sub>T</sub> and R<sub>1</sub>) reflect the charge-transfer kinetics, in which C<sub>T</sub> is related to the double layer capacitance and R<sub>1</sub> represents catalytic charge-transfer resistance.<sup>8-10</sup>

## References

1. Y. Li, W. Qiu, F. Qin, H. Fang, V. G. Hadjiev, D. Litvinov and J. Bao, Identification of Cobalt Oxides with Raman Scattering and Fourier Transform Infrared Spectroscopy, *J. Phys. Chem. C*, 2016, **120**, 4511-4516.
2. B. Rivas-Murias and V. Salgueiriño, Thermodynamic CoO-Co<sub>3</sub>O<sub>4</sub> crossover using Raman spectroscopy in magnetic octahedron-shaped nanocrystals, *J. Raman Spectrosc.*, 2017, **48**, 837-841.
3. J. Wang, R. Gao, D. Zhou, Z. Chen, Z. Wu, G. Schumacher, Z. Hu and X. Liu, Boosting the Electrocatalytic Activity of Co<sub>3</sub>O<sub>4</sub> Nanosheets for a Li-O<sub>2</sub> Battery through Modulating Inner Oxygen Vacancy and Exterior Co<sup>3+</sup>/Co<sup>2+</sup> Ratio, *ACS Catal.*, 2017, **7**, 6533-6541.
4. Y. Li, R. Li, D. Wang, H. Xu, X. Lu, L. Xiao, F. Meng, J. Zhang, M. An and P. Yang, Pulse electrodeposited CoFeNiP as a highly active and stable electrocatalyst for alkaline water electrolysis, *Sustainable Energy & Fuels*, 2021, **5**, 3172-3181.
5. Y. Ma, H. Wang, X. Lv, D. Xiong, H. Xie and Z. Zhang, Three-dimensional ordered mesoporous Co<sub>3</sub>O<sub>4</sub>/peroxymonosulfate triggered nanoconfined heterogeneous catalysis for rapid removal of ranitidine in aqueous solution, *Chem. Eng. J.*, 2022, **443**, 136495.
6. Y.-R. Liu, W.-H. Hu, X. Li, B. Dong, X. Shang, G.-Q. Han, Y.-M. Chai, Y.-Q. Liu and C.-G. Liu, One-pot synthesis of hierarchical Ni<sub>2</sub>P/MoS<sub>2</sub> hybrid electrocatalysts with enhanced activity for hydrogen evolution reaction, *Appl. Surf. Sci.*, 2016, **383**, 276-282.
7. Y. Wang, Y. Jiao, H. Yan, G. Yang, C. Tian, A. Wu, Y. Liu and H. Fu, Vanadium-Incorporated CoP<sub>2</sub> with Lattice

Expansion for Highly Efficient Acidic Overall Water Splitting, *Angew. Chem. Int. Ed.*, 2022, **61**, e202116233.

8. R. Šimpraga, G. Tremiliosi-Filho, S. Y. Qian and B. E. Conway, In situ determination of the 'real are factor' in H<sub>2</sub> evolution electrocatalysis at porous Ni-Fe composite electrodes, *J. Electroanal. Chem.*, 1997, **424** 141-151.
9. N. V. Krstajić, B. N. Grgur, N. S Mladenović, M. V. Vojnović and M. M. Jaksčić, The determination of kinetics parameters of the hydrogen evolution on Ti-Ni alloys by ac impedance, *Electrochim. Acta*, 1997, **42**, 323-330.
10. A. Damian and S. Omanovic, Ni and NiMo hydrogen evolution electrocatalysts electrodeposited in a polyaniline matrix, *J. Power Sources*, 2006, **158**, 464-476.
